# Supplementary material for: One-pot synthesis of copper–nickel sulfide nanowires for overall water splitting in alkaline media
Source: Royal Society of Chemistry journal article supplement (doi:10.1039/c9cc02977j), 2019-01-01
Supplement: c9cc02977j1.pdf [file c9cc02977j1.pdf]

**Supporting Information for**  
**One-Pot Synthesis of Copper-Nickel Sulfide Nanowires for Overall Water**  
**Splitting in Alkaline Media**

Dong Cao<sup>a</sup> and Daojian Cheng<sup>\*a</sup>

<sup>a</sup> State Key Laboratory of Organic-Inorganic Composites, Beijing University of  
Chemical Technology, Beijing 100029, People's Republic of China

\*Corresponding Author. Email:

chengdj@mail.buct.edu.cn

## Experimental section

### Chemicals

Oleylamine (OAm, 80-90%), Bis(2,4-pentanedionato) copper(II) ( $\text{Cu}(\text{acac})_2$ , 98%), Nickel chloride hexahydrate ( $\text{NiCl}_2 \cdot 6\text{H}_2\text{O}$ , 98%), Dimethyldioctadecylammonium chloride (DDAC, 97%) were all purchased from aladdin industries Inc.. Besides, sulfur powder (S) was purchased from Beijing Chemical Works. Ethanol ( $\text{C}_2\text{H}_5\text{OH}$ , 99.7%) and n-hexane (>95%) were also obtained from Beijing Chemical Works. No purification treatment was applied for all the chemicals. The water ( $18 \text{ M}\Omega \text{ cm}^{-1}$ ) was obtained from an ultra-pure purification system.

### Synthesis of catalysts

In a facile process to synthesize copper-nickel sulfide nanowires, 0.8 mmol cupric (II) acetylacetonate (Aladdin Industrial Inc., 98%), 0.25 mmol nickel (II) chloride hexahydrate (Aladdin Industrial Inc., 99.3%), 0.51 mmol dimethyldistearylammonium chloride (Aladdin Industrial Inc., 97%) were added into a three-necked bottle. Then, 8.5 mL oleylamine (Aladdin Industrial Inc., 80-90%) was put in the same three-necked bottle. Next, these chemicals were mixed under the  $\text{N}_2$  atmosphere at  $80^\circ\text{C}$  for 45 min. After that, the temperature was raised to  $180^\circ\text{C}$  for 4 h. Then, the temperature was raised to  $225^\circ\text{C}$  for 1.5 h. Afterward, 0.25 mmol sulfur powder (Aladdin Industrial Inc., 99.5%) was added into the above bottle when the temperature decreased from  $225^\circ\text{C}$  to  $100^\circ\text{C}$ . Subsequently, the temperature was kept at  $150^\circ\text{C}$  for 3 h. Finally, the obtained copper-nickel sulfide nanowires were washed

with the mixed solvent of ethanol (Beijing Chemical Works) and hexane (Beijing Chemical Work) for three times. The synthesis of Cu and CuNi nanowires was the same as the method of copper-nickel sulfide nanowires, except temperature was raised to 225 °C for 1.5 h and sulfur powder was added into the bottle, respectively.

### **Electrochemical measurements**

The electrochemical performances for both HER and OER were measured in a three-electrode system by a CHI 760E work station (Chen Hua in China). 4 mg of copper-nickel sulfide nanowire was mixed with 0.5 ml ethanol, 0.1 mL water and 15  $\mu$ L nafion. Then, the catalyst ink was obtained after ultrasound the mixture above for 30 minutes. Meanwhile, a carbon rod and saturated calomel electrode (SCE) were used as the counter electrode and reference electrode, respectively. Beside, 0.2 mL ink of catalyst was dropped on the carbon paper, serving as a working electrode. IR drop was compensated at 95% through positive feedback using the CHI 760E work station. Additionally, the scan rate of CV and LSV were 50 mV s<sup>-1</sup> and 5 mV s<sup>-1</sup>, respectively. Furthermore, the electrochemical impedance spectroscopy (EIS) was tested at scanning frequency from 100 kHz to 0.01 Hz.

### **Characterization of Materials**

The morphology and structure of nanomaterials were observed on HT7700 transmission electron microscope and TF20 transmission electron microscope (Jeol 2100F) which is coupled with energy dispersive X-ray spectroscopy (EDS) with an acceleration voltage of 200 kV. In addition, EDS line-scan, selected area electron diffraction (SAED) and mapping analysis were also carried out on a TF20 (Jeol

2100F) with a high-angle annular dark-field scanning transmission electron microscope (HAADF-STEM). The X-ray diffraction (XRD) was recorded on X'Pert PRO MPD (D8) instrument to detect the phase composition of samples. The surface characteristics of materials were tested by X-ray photoelectron spectroscopy (XPS) carried out on ESCALAB 250 XI system with an Mg-K $\alpha$  source.

### Table of content

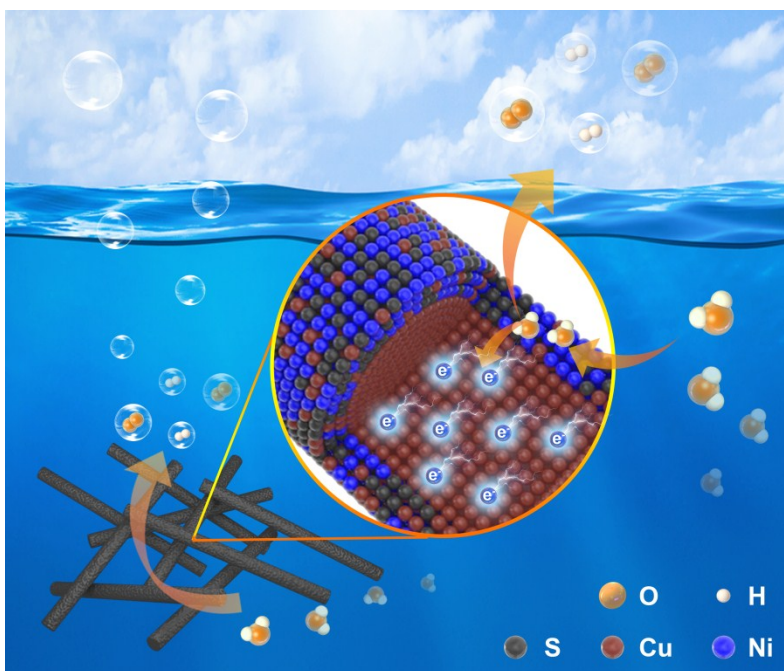

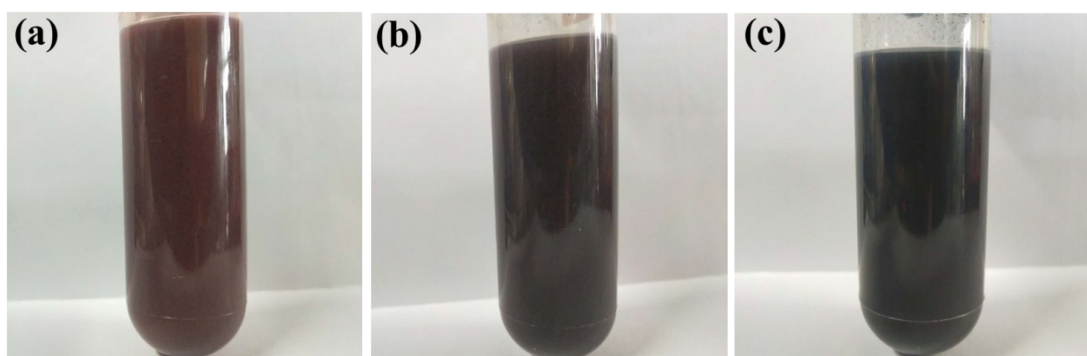

**Fig. S1** Photos of different nanocrystals (a) Cu NWs, (b) CuNi NWs and (c) copper-nickel sulfide nanowires.

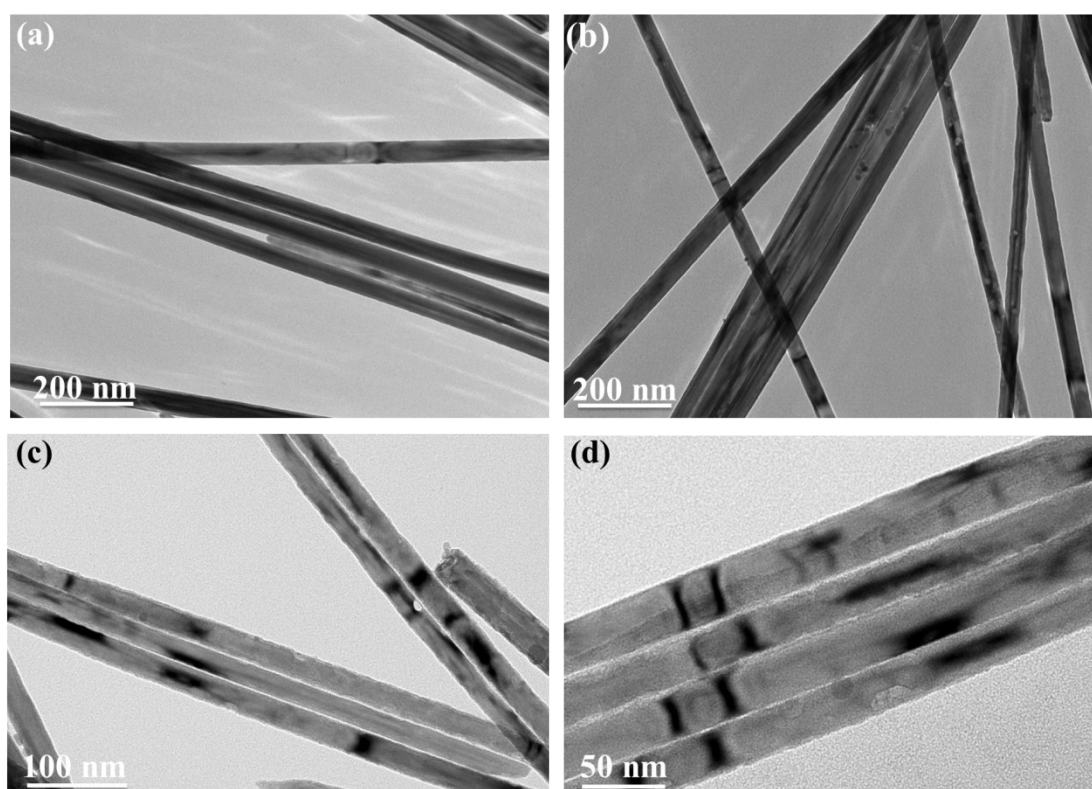

**Fig. S2** The TEM images of (a) Cu NWs, (b) CuNi NWs and (c, d) copper-nickel sulfide nanowires.

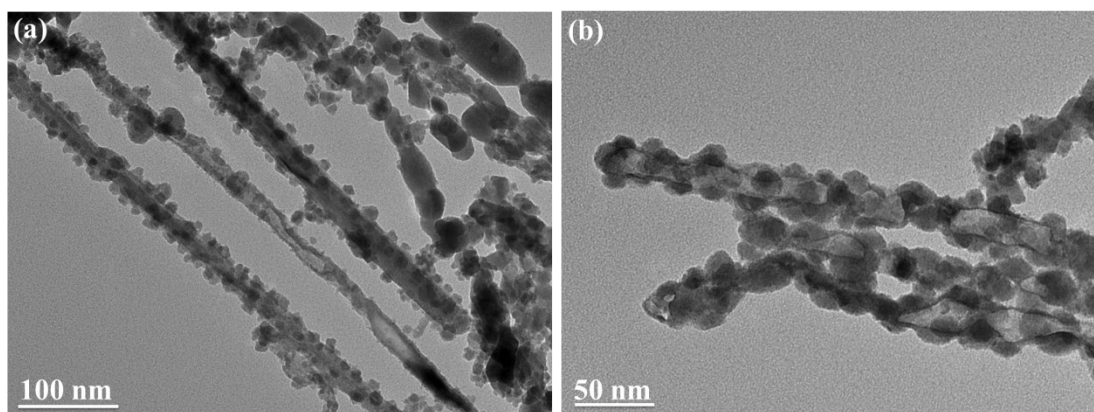

**Fig. S3** (a, b) The TEM images of copper sulfide nanocrystals.

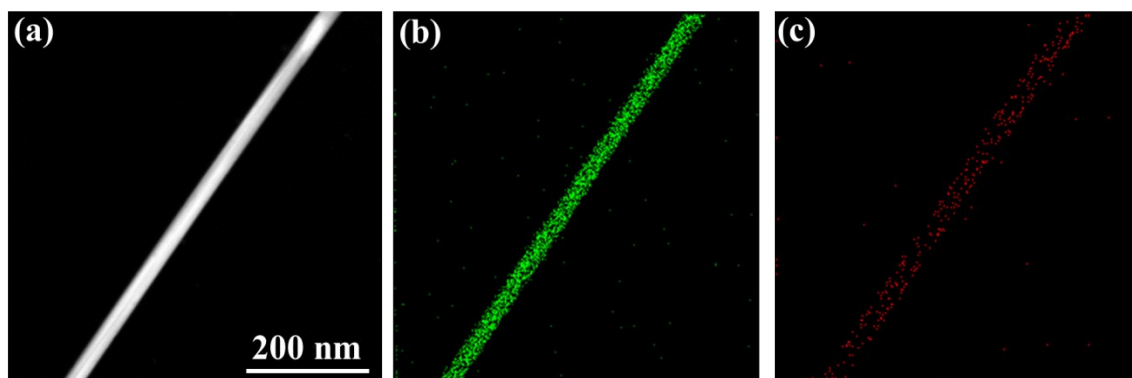

**Fig. S4** The element mapping of CuNi alloy NWs. (a) The STEM image, (b) Cu element and (c) Ni element.

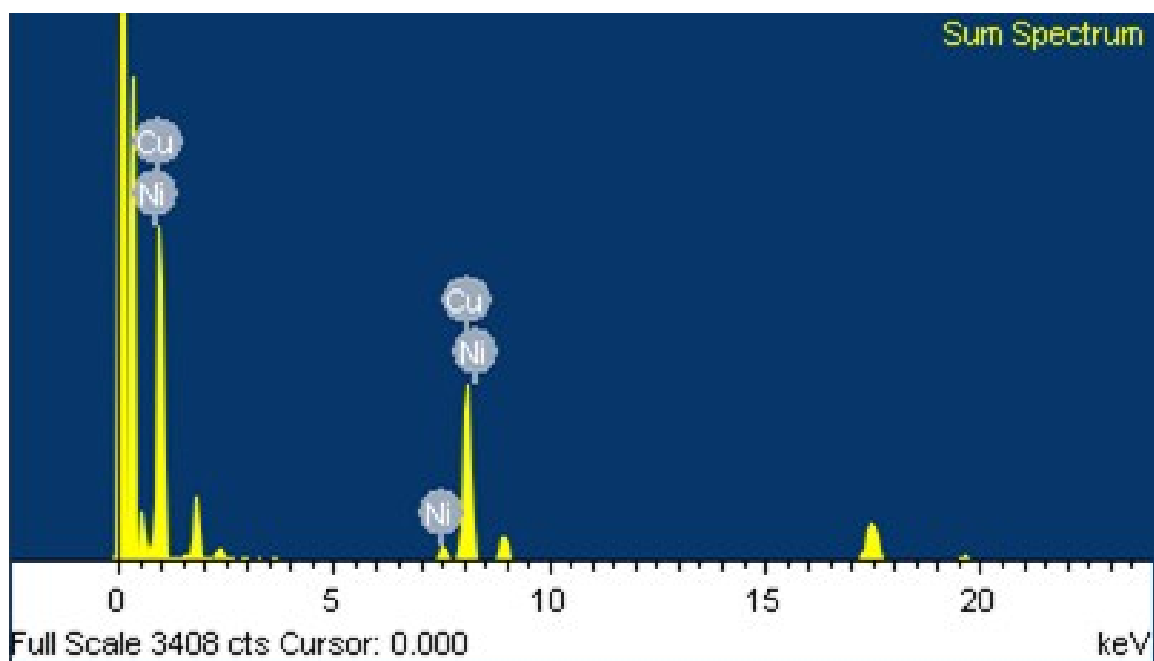

**Fig. S5** The EDS spectrum of CuNi alloy NWs.

**Table S1.** The ratio of Cu and Ni elements for CuNi alloy NWs.

| Element | Weight% | Atomic% |
|---------|---------|---------|
| Ni      | 6.34    | 6.82    |
| Cu      | 93.66   | 93.18   |
| Totals  | 100.00  | 100.00  |

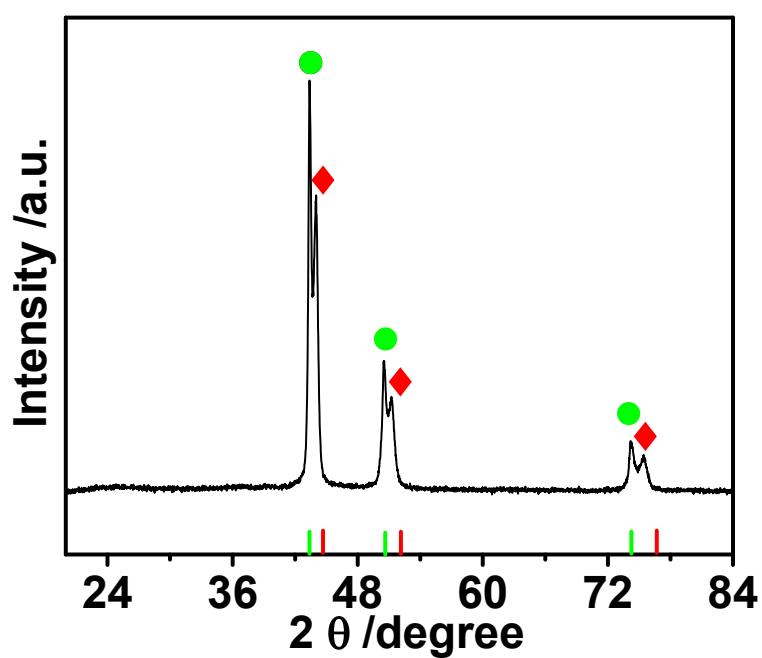

**Fig. S6** The XRD of CuNi alloy NWs (the green mark is the peak of copper and red mark is corresponding to the peak of CuNi alloy).



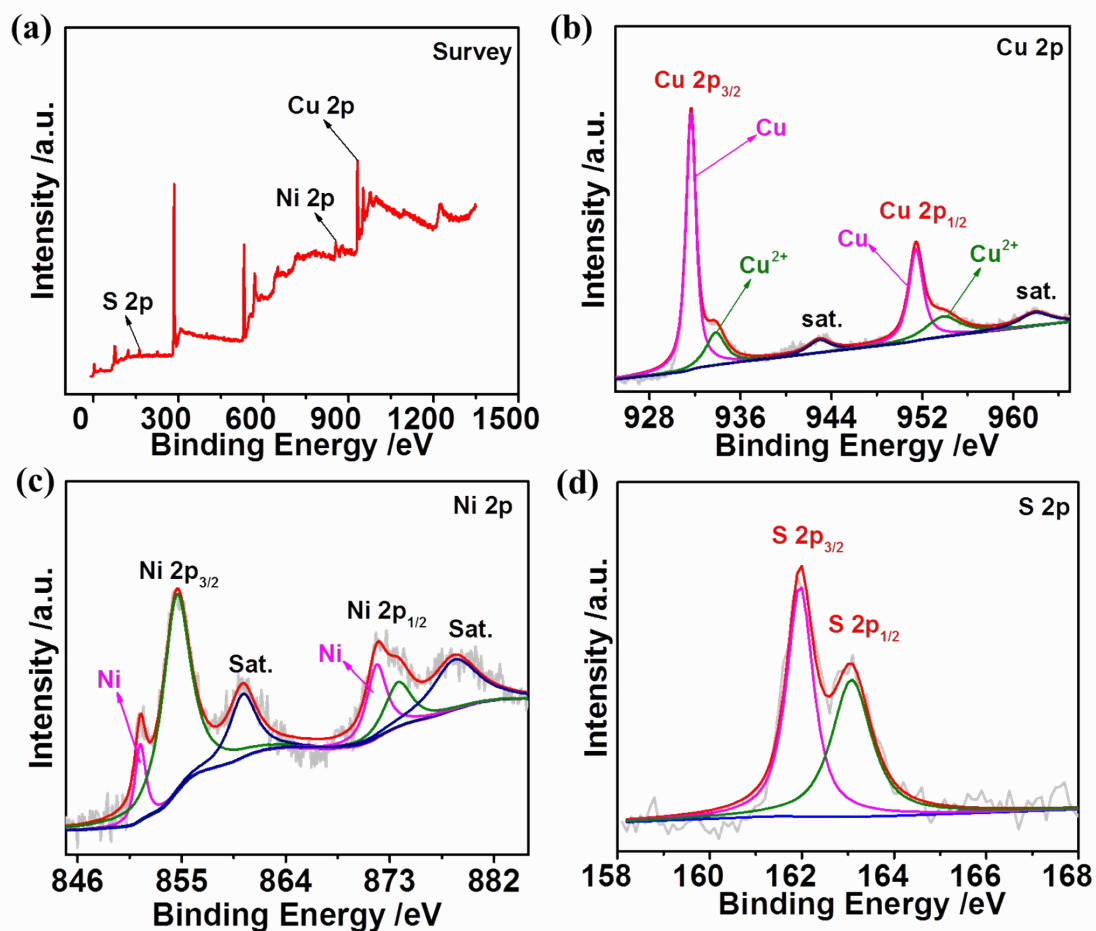

**Fig. S7** (a) XPS survey spectra of copper-nickel sulfide nanowires. (b-d) illustrating the XPS spectra of Cu 2p, Ni 2p and S 2p for copper-nickel sulfide nanowires, respectively.

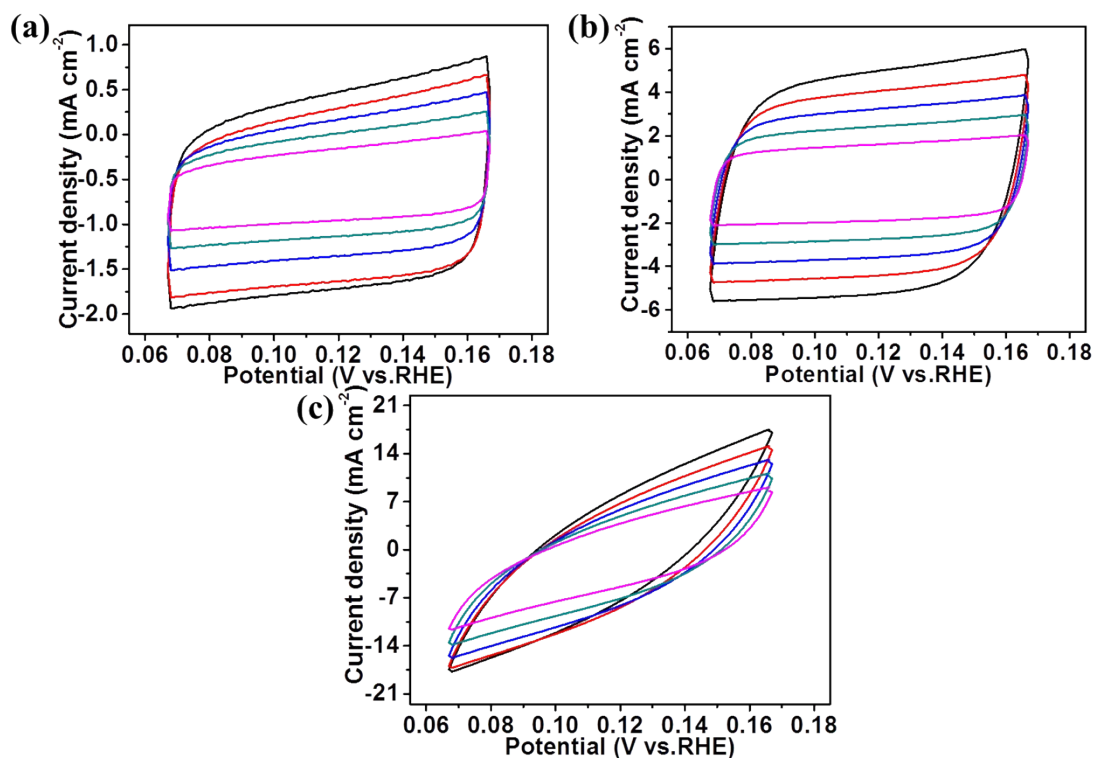

**Fig. S8** Double layer capacitance measurements for HER with scan rates from 20 to 100 mV s<sup>-1</sup> for (a) Cu NWs, (b) CuNi alloy NWs, and (c) copper-nickel sulfide NWs.

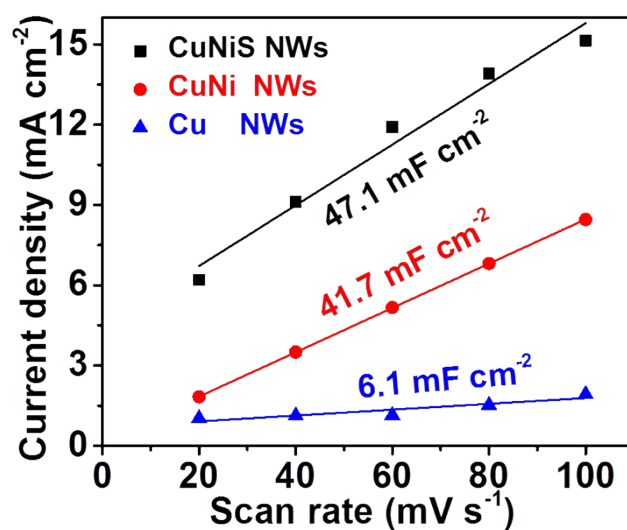

**Fig. S9** Linear fitting of the capacitive currents of different catalysts versus scan rates for HER (copper-nickel sulfide nanowires are abbreviated to CuNiS NWs).

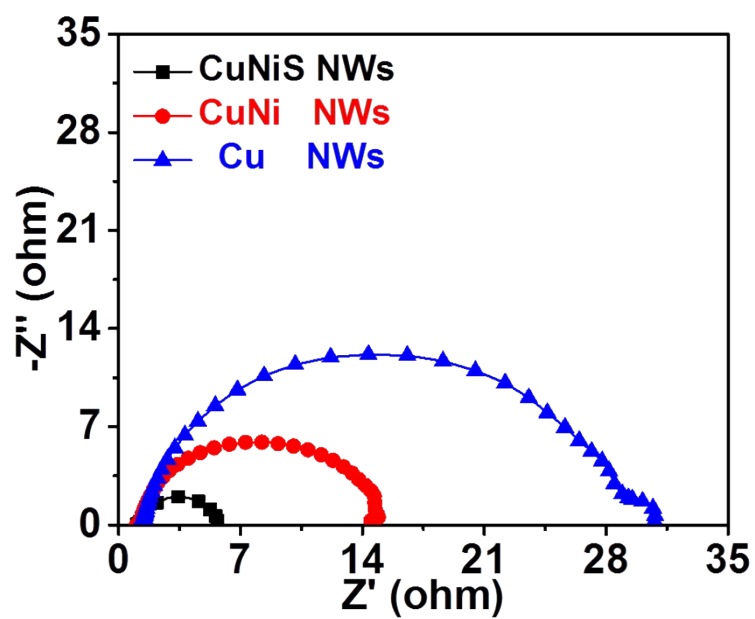

**Fig. S10** The EIS Nyquist plots of different materials for HER.

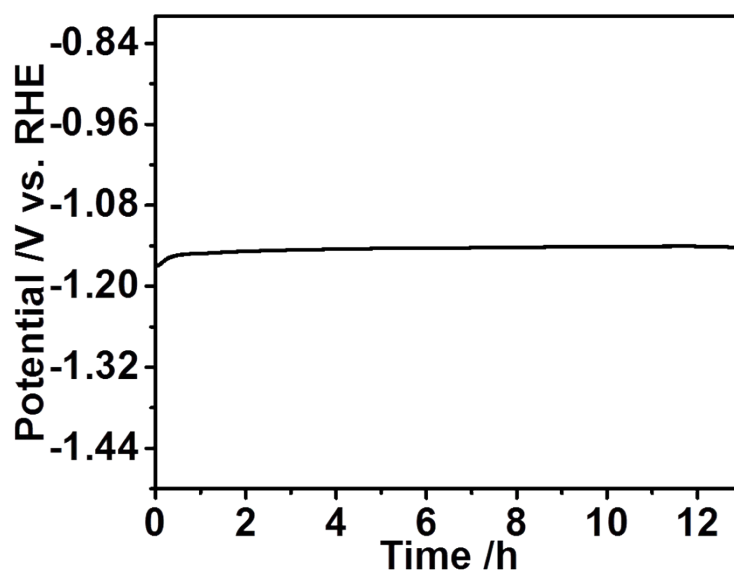

**Fig. S11** Chronopotentiometric curves of copper-nickel sulfide nanowires for HER at constant current densities of  $10 \text{ mA cm}^{-2}$  in 1 M KOH.

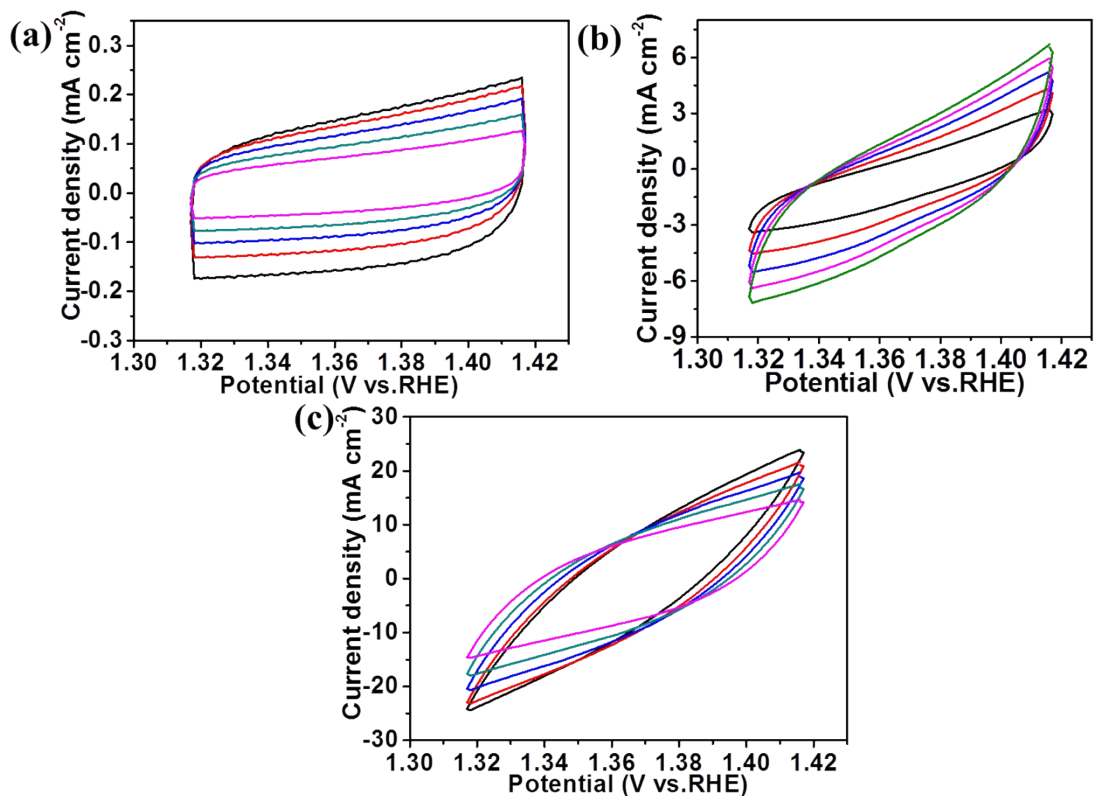

**Fig. S12** Double layer capacitance measurements for OER with scan rates from 20 to 100 mV s<sup>-1</sup> for (a) Cu NWs, (b) CuNi alloy NWs, and (c) copper-nickel sulfide NWs.

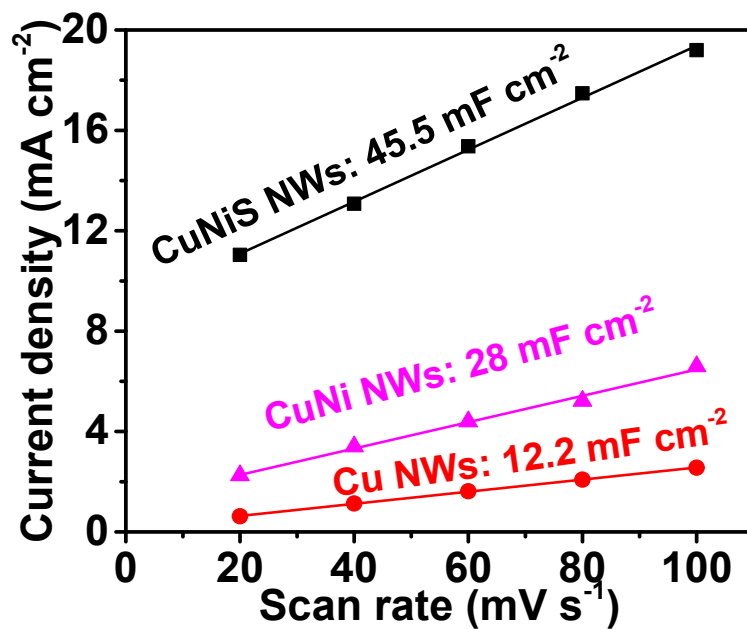

**Fig. S13** Linear fitting of the capacitive currents of different catalysts versus scan rates for OER.

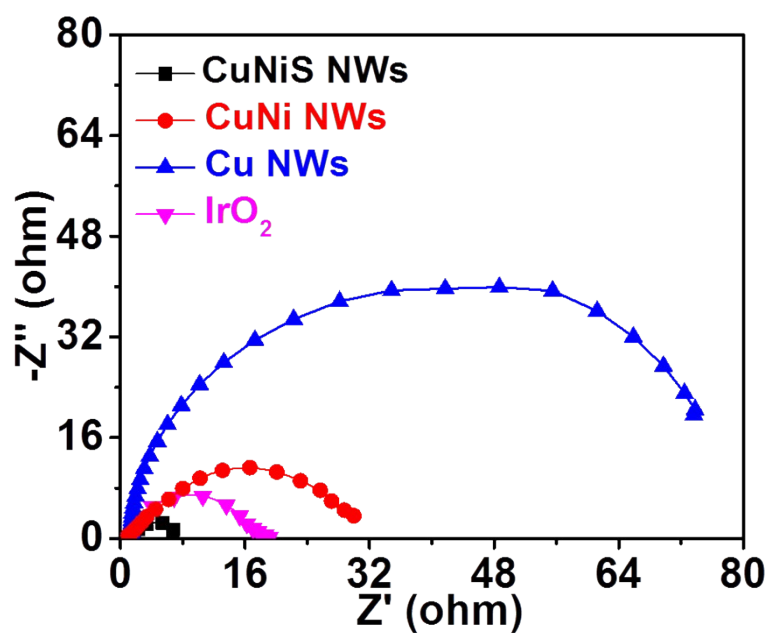

**Fig. S14** The EIS Nyquist plots of different materials for OER.

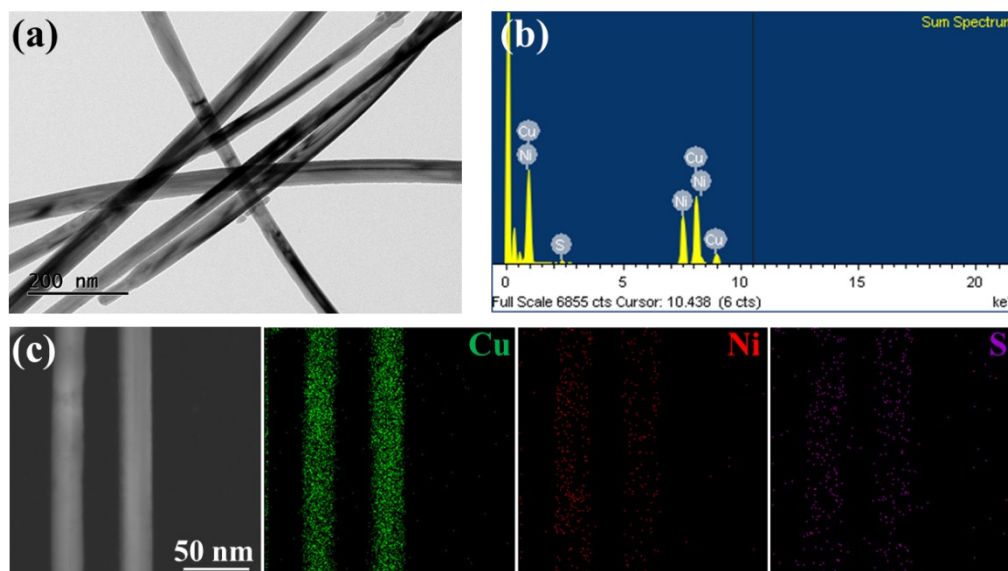

**Fig. S15** (a) TEM image of copper-nickel sulfide NWs when 0.05 mmol S powder was used. (b) EDS result of copper-nickel sulfide NWs and corresponding atom ratio of Cu/Ni/S is 94.07/3.47/2.46. (c) Corresponding elemental mapping of copper-nickel sulfide NWs.

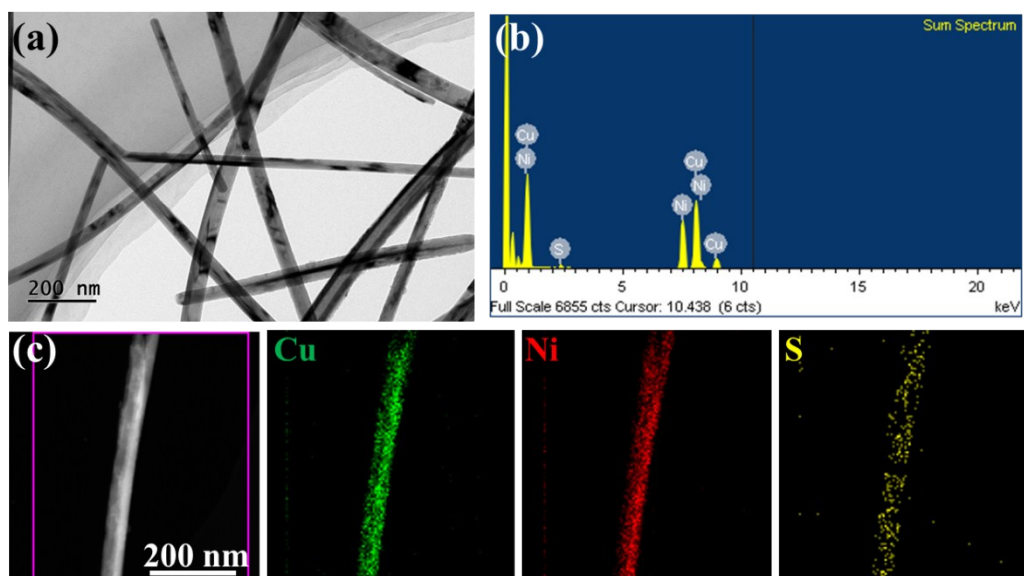

**Fig. S16** (a) TEM image of copper-nickel sulfide NWs when 0.15 mmol S powder was used. (b) EDS result of copper-nickel sulfide NWs and corresponding atom ratio of Cu/Ni/S is 78.44/14.21/7.35. (c) Corresponding elemental mapping of copper-nickel sulfide NWs.

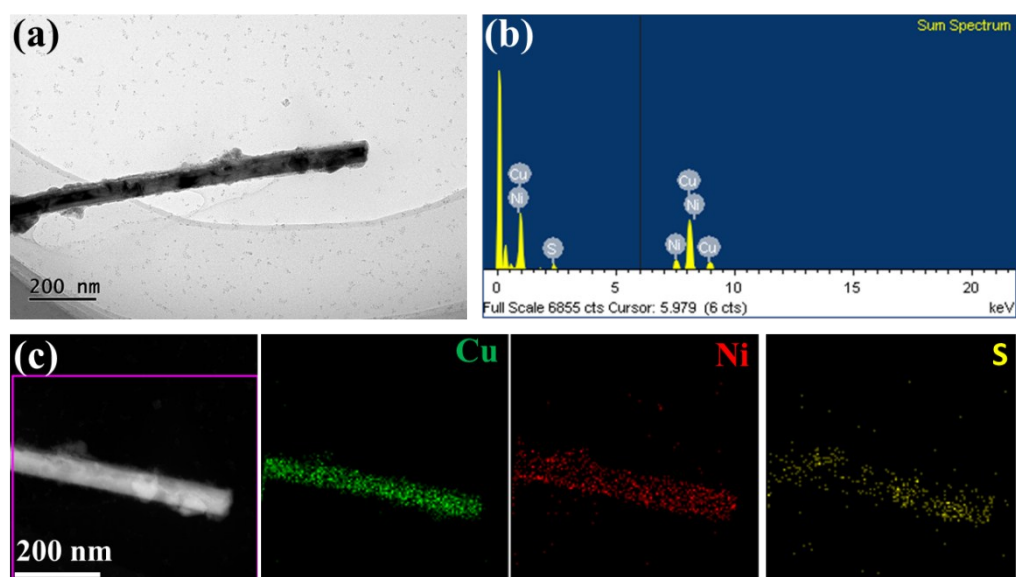

**Fig. S17** (a) TEM image of copper-nickel sulfide NWs when 0.35 mmol S powder was used and obvious nanoparticles can be generated outside the nanowires. (b) EDS result of copper-nickel sulfide NWs and corresponding atom ratio of Cu/Ni/S is 59.62/30.05/10.33. (c) Corresponding elemental mapping of copper-nickel sulfide NWs.

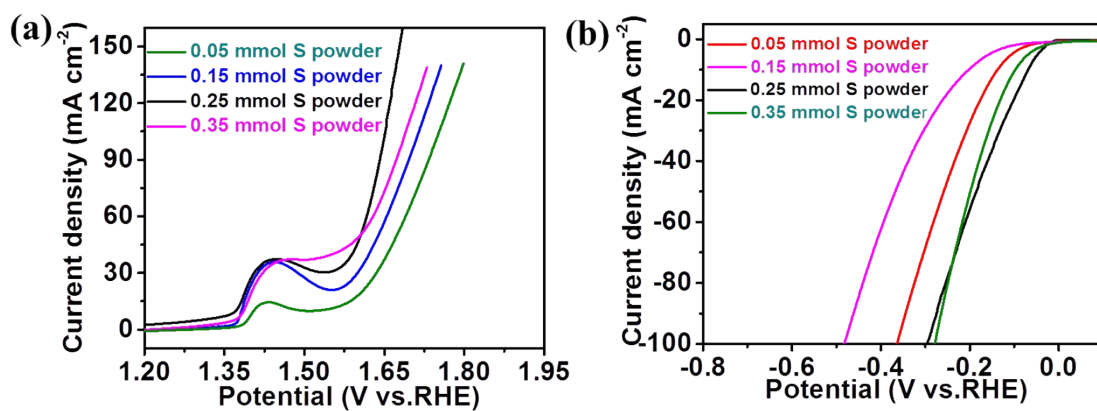

**Fig. S18** The OER and HER performances for copper-nickel sulfide NWs synthesized by different amount of S powder.

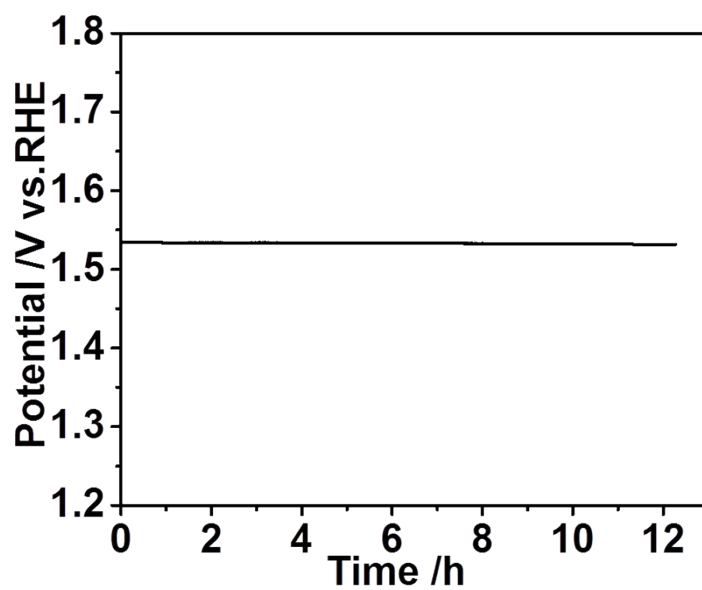

**Fig. S19** Chronopotentiometric curves for copper-nickel sulfide nanowires for OER at constant current densities of 30  $\text{mA cm}^{-2}$  in 1 M KOH.

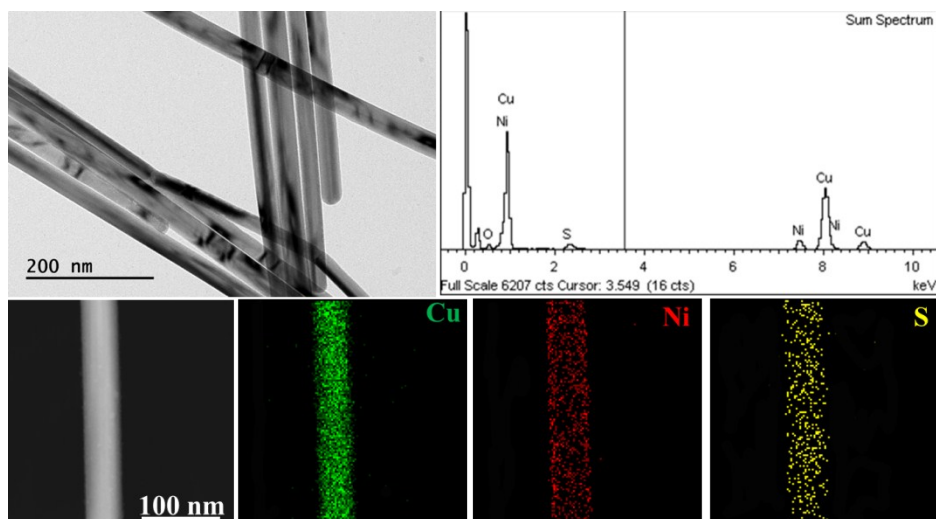

**Fig. S20** (a) TEM image of copper-nickel sulfide NWs after electrochemical measurement. (b) EDS result of copper-nickel sulfide NWs. (c) Corresponding elemental mapping of copper-nickel sulfide NWs after electrochemical test.

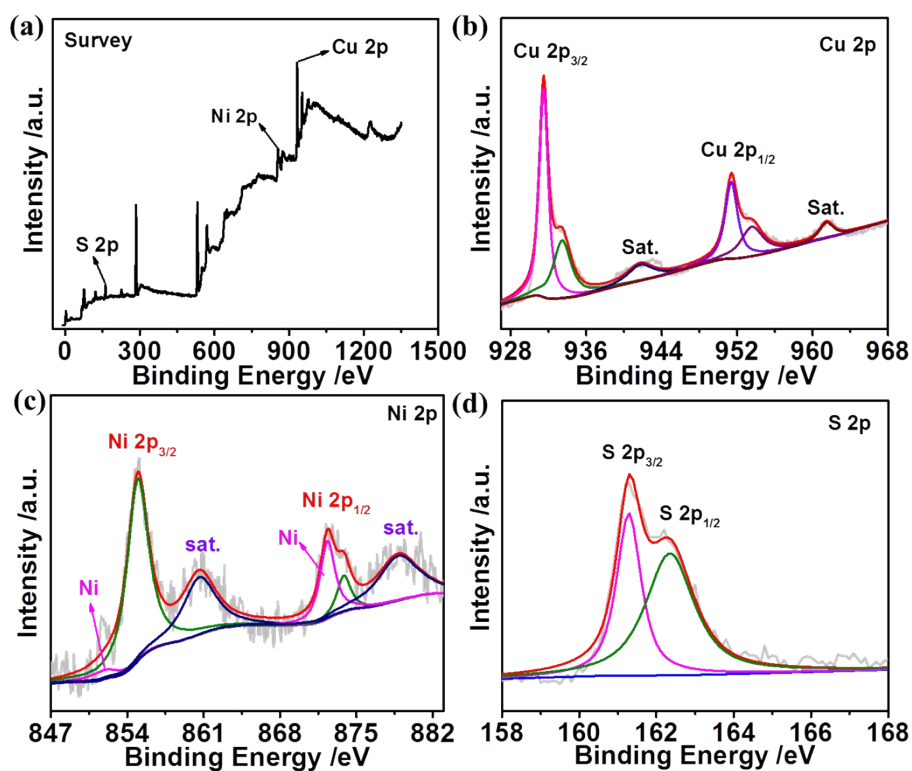

**Fig. S21** The XPS results of copper-nickel sulfide nanowires after electrochemical test in 1M KOH medium.



**Table S2.** Comparison of HER performance of various nonprecious catalysts in alkaline medium

| Catalyst                                               | Electrolyte Solution | Current Density (mA cm <sup>-2</sup> ) | Overpotential (mV) | References |
|--------------------------------------------------------|----------------------|----------------------------------------|--------------------|------------|
| CuNiS NWs                                              | 1M KOH               | 10                                     | 71                 | This work  |
| CdS/Ni <sub>3</sub> S <sub>2</sub> /PNF                | 1M KOH               | 10                                     | 121                | 1          |
| Co <sub>2</sub> P/CNTs                                 | 1M KOH               | 10                                     | 132                | 2          |
| Ni@NC-800                                              | 1M KOH               | 10                                     | 70                 | 3          |
| Co(S <sub>0.71</sub> Se <sub>0.29</sub> ) <sub>2</sub> | 1M KOH               | 10                                     | 122                | 4          |
| Cu <sub>x</sub> Ni <sub>4-x</sub> N/NF                 | 1M KOH               | 10                                     | 12                 | 5          |
| NiS <sub>2</sub>                                       | 1M KOH               | 10                                     | 148                | 6          |
| V-Co <sub>4</sub> N                                    | 1M KOH               | 10                                     | 37                 | 7          |
| Ni-Co-P                                                | 1M KOH               | 10                                     | 58                 | 8          |
| Ni-Co-P/NF                                             | 1M KOH               | 10                                     | 156                | 9          |
| NiFe HNSs                                              | 1M KOH               | 10                                     | 189                | 10         |
| Ni/V <sub>2</sub> O <sub>3</sub>                       | 1M KOH               | 10                                     | 61                 | 11         |

**Table S3.** Comparison of OER performance of various nonprecious catalysts in alkaline medium

| Catalyst                                           | Electrolyte Solution | Current Density (mA cm <sup>-2</sup> ) | Overpotential (mV) | References |
|----------------------------------------------------|----------------------|----------------------------------------|--------------------|------------|
| CuNiS NWs                                          | 1M KOH               | 30                                     | 307                | This work  |
| NiS@SLS                                            | 0.1M KOH             | 11                                     | 297                | 12         |
| CdS/Ni <sub>3</sub> S <sub>2</sub> /PNF            | 1M KOH               | 10                                     | 151                | 1          |
| Co <sub>2</sub> P/CNTs                             | 1M KOH               | 10                                     | 292                | 2          |
| Ni@NC-800                                          | 1M KOH               | 10                                     | 280                | 3          |
| Cu <sub>2</sub> S/CF                               | 1M KOH               | 20                                     | 336                | 13         |
| Co(S <sub>x</sub> Se <sub>1-x</sub> ) <sub>2</sub> | 1M KOH               | 10                                     | 283                | 4          |
| CuS-Ni <sub>3</sub> S <sub>2</sub> /CuNi/NF        | 1M KOH               | 100                                    | 337                | 14         |
| NiS                                                | 1M KOH               | 10                                     | 320                | 6          |
| Ni-Co-S/NF                                         | 1M KOH               | 40                                     | 270                | 9          |
| NiFe HNSs                                          | 1M KOH               | 10                                     | 220                | 10         |
| CuCo <sub>2</sub> S <sub>4</sub> /CF               | 1M KOH               | 60                                     | 259                | 15         |
| $\alpha$ -Co <sub>4</sub> Fe(OH) <sub>x</sub>      | 1M KOH               | 10                                     | 295                | 16         |

**Table S4.** Comparison of cell voltage for overall water splitting of various nonprecious catalysts

| Catalyst                                                                                 | Electrolyte Solution | Current Density (mA cm <sup>-2</sup> ) | Voltage (V) | References |
|------------------------------------------------------------------------------------------|----------------------|----------------------------------------|-------------|------------|
| CuNiS NWs                                                                                | 1M KOH               | 10                                     | 1.54        | This work  |
| NiS // NiS <sub>2</sub>                                                                  | 1M KOH               | 10                                     | 1.58        | 6          |
| FeB <sub>2</sub> -NF                                                                     | 1M KOH               | 10                                     | 1.57        | 17         |
| Ni/Mo <sub>2</sub> C-PC                                                                  | 1M KOH               | 10                                     | 1.66        | 18         |
| Co <sub>9</sub> S <sub>8</sub> @NOSC-900                                                 | 1M KOH               | 10                                     | 1.60        | 19         |
| Ni@NC-800/NF                                                                             | 1M KOH               | 10                                     | 1.60        | 3          |
| Co <sub>2</sub> P/CNT                                                                    | 1M KOH               | 10                                     | 1.53        | 2          |
| CdS/Ni <sub>3</sub> S <sub>2</sub> /PNF                                                  | 1M KOH               | -                                      | 1.50        | 1          |
| NiCo <sub>2</sub> O <sub>4</sub> // Ni <sub>0.33</sub> Co <sub>0.67</sub> S <sub>2</sub> | 1M KOH               | 5                                      | 1.65        | 20         |
| np-(Co <sub>0.52</sub> Fe <sub>0.48</sub> ) <sub>2</sub> P                               | 1M KOH               | 10                                     | 1.53        | 21         |

1. S. Qu, J. Huang, J. Yu, G. Chen, W. Hu, M. Yin, R. Zhang, S. Chu and C. Li, *ACS Appl. Mater. Interfaces*, 2017, **9**, 29660-29668.
2. D. D and K. K. N, *Nano Energy*, 2016, **30**, 303-311.
3. Y. Xu, W. Tu, B. Zhang, S. Yin, Y. Huang, M. Kraft and R. Xu, *Adv. Mater.*, 2017, **29**, 1605957.
4. F. L, W. X. Li, Y. X. Guan, Y. Y. Feng, H. J. Zhang, S. L. Wang and W. Yu, *Adv. Funct. Mater.*, 2017, **27**, 1701008.
5. Y. M. Ma, D. H. Zheng, Z. F. Wu, B. Zhang, Y. Zhang, C. H. Xiao and S. J. Ding, *J. Mater. Chem. A*, 2017, **5**, 24850-24858.
6. P. Luo, H. J. Zhang, L. Liu, Y. Zhang, J. Deng, C. H. Xu, N. Hu and Y. Wang, *ACS Appl. Mater. Interfaces*, 2017, **9**, 2500-2508.
7. Z. Y. Chen, Y. Song, J. Y. Cai, X. S. Zheng, D. D. Han, Y. S. Wu, Y. P. Zang, S. W. Niu, X. J. Liu and G. M. Wang, *Angew. Chem. Int. Edit.*, 2018, **57**, 5076-5080.
8. Z. W. Fang, L. L. Peng, M. Q. Y, Y., X. Zhang, Y. J. Xie, J. J. Cha and G. H. Yu, *J. Am. Chem. Soc.*, 2018, **140**, 5241-5247.
9. Y. Q. Gong, Z. F. Xu, H. L. Pan, Y. Lin, Z. Yang and J. L. Wang, *J. Mater. Chem. A*, 2018, **6**, 12506-12514.
10. X. H. Sun, Q. Shao, Y. C. Pi, J. Guo and X. Q. Huang, *J. Mater. Chem. A*, 2017, **5**, 7769-7775.
11. M. Ming, Y. L. Ma, Y. Zhang, L. B. Huang, L. Zhao, Y. Y. Chen, X. Zhang, G. Y. Fan and J. S. Hu, *J. Mater. Chem. A*, 2018, **6**, 21452-21457.
12. J. S. Chen, J. W. Ren, M. Shalom, T. Fellinger and M. Antonietti, *ACS Appl. Mater. Interfaces*, 2016, **8**, 5509-5516.
13. L. B. He, D. Zhou, Y. Lin, R. X. Ge, X. D. Hou, X. P. Sun and C. B. Zheng, *ACS Catal.*, 2018, **8**, 3859-3864.
14. N. Zhang, Y. Gao, Y. H. Mei, J. Liu, W. Y. Song and Y. Yu, *Inorg. Chem. Front*, 2018, **6**, 293-302.
15. L. Yang, L. S. Xie, X. Ren, Z. Q. Wang, Z. A. Liu, G. Du, A. M. Asiri, Y. D. Yao and X. P. Sun, *Chem. Commun.*, 2018, **54**, 78-81.
16. H. Y. Jin, S. J. Mao, G. P. Zhan, F. Xu, X. B. Bao and Y. Wang, *J. Mater. Chem. A*, 2016, **5**, 1078-1084.
17. H. Li, P. Wen, Q. Li, C. C. Dun, J. H. Xing, C. Lu, S. Adhikari, J. Lin, D. L. Carroll and S. M. Geyer, *Adv. Energy Mater.*, 2017, **7**, 1700513-1700524.
18. Z. Y. Yu, Y. Duan, M. R. Gao, C. C. Lang, Y. R. Zheng and S. H. Yu, *Chem. Sci.*, 2017, **8**, 968-973.
19. S. H. Huang, Y. Y. Meng, S. M. He, A. Goswami, T. Asefa and M. M. Wu, *Adv. Funct. Mater.*, 2017, **27**, 1606585-1606594.
20. Z. Peng, D. S. Jia, A. M. Al-Enizi, A. A. Elzatahry and G. F. Zheng, *Adv. Energy Mater.*, **5**, 1402031-1402037.
21. Y. W. Tan, H. Wang, P. Liu, Y. H. Shen, C. Cheng, A. Hirata, T. Fujita, Z. Tang and M. W. Chen, *Energy Environ. Sci.*, 2016, **9**, 2257-2261.
